# Supplementary material for: Personality dimensions emerging during adolescence and young adulthood are underpinned by a single latent trait indexing impairment in social functioning
Source: BMC Psychiatry. 2018 Jan 26;18:23. doi: 10.1186/s12888-018-1595-0 (PMC5787243; doi:10.1186/s12888-018-1595-0)
Supplement: Additional file 1: — Online Supplement. (PDF 3750 kb) [file 12888_2018_1595_MOESM1_ESM.pdf]

## ***Online Supplement***

### **The Antisocial Process Screening Device (APSD)**

#### **Callous-Unemotional Scale:**

APSD03: You care about how well you do at school/work. (R)

APSD07: You are good at keeping promises. (R)

APSD12: You feel bad or guilty when you do something wrong. (R)

APSD18: You are concerned about the feelings of others. (R)

APSD19: You hide your feelings or emotions from others.

#### **Impulsivity:**

APSD01: You blame others for your mistakes.

APSD04: You act without thinking of the consequences.

APSD09: You get bored easily.

APSD13: You do risky or dangerous things.

APSD17: You do not plan ahead or you leave things until the last minute.

#### **Narcissism:**

APSD05: Your emotions are shallow and fake.

APSD08: You brag a lot about your abilities, accomplishments, or possessions.

APSD10: You use or con other people to get what you want.

APSD11: You tease or make fun of other people.

APSD14: You act charming and nice to get things you want.

APSD15: You get angry when corrected or punished.

APSD16: You think you are better or more important than other people.

### **The Barratt Impulsiveness Scale (BIS)**

#### **Attentional Impulsivity:**

BIS05: I don't pay attention.

BIS06: I have racing thoughts.

BIS09: I concentrate easily. (R)

BIS11: I squirm at plays and lectures.

BIS20: I am a steady thinker. (R)

BIS26: I often have extraneous thoughts when thinking.

BIS28: I am restless at the theatre or lecture.

#### **Motor Impulsivity:**

BIS02: I do things without thinking.

BIS04: I am happy-go-lucky.

BIS17: I act on impulse.

BIS19: I act on the spur of the moment.

BIS22: I buy things on impulse.

BIS25: I spend or charge more than I earn.

BIS30: I am future orientated. (R)

**Non-planning Impulsivity:**

BIS01: I plan tasks carefully. (R)

BIS07: I plan trips well ahead of time. (R)

BIS08: I am self controlled. (R)

BIS10: I save regularly. (R)

BIS12: I am a careful thinker. (R)

BIS13: I plan for job security. (R)

BIS14: I say things without thinking.

BIS15: I like to think about complex problems. (R)

BIS18: I get easily bored when solving thought problems.

BIS27: I am more interested in the present than the future.

BIS29: I like puzzles. (Reversed)

**The Child and Adolescent Dispositions Scale (CADS)**

**Daring:**

CADS03: Are you daring and adventurous?

CADS06: Do you like rough games and sports?

CADS11: Do you like things that are exciting and loud?

CADS50: Are you brave?

**Negative Emotionality:**

CADS20: Are you emotional?

CADS23: Are you easily embarrassed?

CADS28: Do you get upset easily?

CADS36: Do you react intensely when you get upset?

CADS40: Are you selfish?

CADS44: Are you calm and easy-going? (R)

CADS46: Do you exaggerate things and blow them out of proportion?

CADS47: Are you jealous of what other people have?

CADS49: Do your moods change unpredictably?

**Prosociality:**

CADS04: Do you do things to help other people your age without being asked?

CADS05: Do you try to do excellent work in school or at work?

CADS07: Would you feel guilty if you did something that broke the law?

CADS17: Do you share your things with other people without being asked?

CADS19: Do you feel bad for other people when they get hurt?

CADS34: Do you try to cheer up other people your age who are sad or upset?

CADS37: Do you feel sorry for kids who get picked on?

CADS38: Are you cautious?

CADS41: Do you want everyone to follow the rules, including yourself?

CADS42: Do you care about other people's feelings?

CADS43: Do you enjoy learning about new and interesting things?

CADS48: Are you concerned about what is right and wrong?

### **The Inventory of Callous and Unemotional Traits (ICU)**

#### **Callousness:**

ICU02: What I think is right and wrong is different from what other people think.

ICU04: I do not care who I hurt to get what I want.

ICU07: I do not care about being on time.

ICU08: I am concerned about the feelings of others. (R)

ICU09: I do not care if I get into trouble.

ICU10: I do not let my feelings control me.

ICU11: I do not care about doing things well.

ICU12: I seem very cold and uncaring to others.

ICU20: I do not like to put the time into doing things well.

ICU21: The feelings of others are unimportant to me.

#### **Uncaring:**

ICU03: I care about how well I do at school or work.

ICU05: I feel bad or guilty when I do something wrong.

ICU13: I easily admit to being wrong.

ICU15: I always try my best.

ICU16: I apologise (say I am sorry) to persons I hurt.

ICU17: I try not to hurt others feelings.

ICU23: I work hard on everything I do.

ICU24: I do things to make others feel good.

#### **Unemotional:**

ICU01: I express my feelings openly.

ICU06: I do not show my emotions to others.

ICU14: It is easy for others to tell how I am feeling.

ICU19: I am very expressive and emotional.

ICU22: I hide my feelings from others.

**Cognitive-Perceptual:**

SPQ13: Have you ever had the sense that some person or force is around you, even though you cannot see anyone?

SPQ21: Are you sometimes sure that other people can tell what you are thinking?

SPQ28: Have you ever noticed a common event or object that seemed to be a special sign for you?

SPQ44: Do you often pick up hidden threats or put-downs from what people say or do?

SPQ45: When shopping do you get the feeling that other people are taking notice of you?

SPQ47: Have you had experiences with astrology, seeing the future, UFOs, ESP, or a sixth sense?

SPQ61: Do you ever suddenly feel distracted by distant sounds that you are not normally aware of?

SPQ65: Do you often have to keep an eye out to stop people from taking advantage of you?

**Disorganized:**

SPQ14: People sometimes comment on my unusual mannerisms and habits.

SPQ32: Some people think that I am a very bizarre person.

SPQ42: Some people find me a bit vague and elusive during a conversation.

SPQ67: I am an odd, unusual person.

SPQ69: I find it hard to communicate clearly what I want to say to people.

**Interpersonal:**

SPQ08: People sometimes find me aloof and distant.

SPQ36: I feel I have to be on my guard even with friends.

SPQ46: I feel very uncomfortable in social situations involving unfamiliar people.

SPQ52: Have you found that it is best not to let other people know too much about you?

SPQ57: I tend to keep in the background on social occasions.

SPQ66: Do you feel that you cannot get close to people?

SPQ71: I feel very uneasy talking to people I do not know well.

SPQ73: I tend to keep my feelings to myself.

## Analytical strategy

The following formulae were used to compute omega coefficients<sup>1,2</sup>  $\omega_H$  (indicating how much common variance is accounted for by the general trait),  $\omega_G$  (indicating the internal consistency reliability of the general factor when controlling for the effects of all specific factors),  $\omega_S$  (indicating the internal consistency reliability of a specific factor controlling for the effect of other factors in the model):

$$\omega_G = \frac{(\sum \lambda_{iGEN})^2}{(\sum \lambda_{iGEN})^2 + \sum \theta_i}$$

$$\omega_S = \frac{(\sum \lambda_{iS})^2}{(\sum \lambda_{iS})^2 + (\sum \lambda_{iGEN/S})^2 + \sum \theta_i}$$

$$\omega_H = \frac{(\sum \lambda_{iGEN})^2}{(\sum \lambda_{iGEN})^2 + (\sum \lambda_{iS_1})^2 + \dots + (\sum \lambda_{iS_p})^2 + \sum \theta_i}$$

$\lambda_{iGEN}$  factor loadings on the General Factor

$\lambda_{iS}$  factor loadings on a Specific Factor

$\lambda_{iGEN/S}$  factor loadings of the General Factor including only items making up a given Specific Factor  $S$

$\theta_i$  items' unique (error) variances

Prior to computing  $\omega_H$  and  $\omega_G$  items with negative loadings on the general factor were reversed and factor loadings from the subsequent bifactor CFA were used in these formulae<sup>1</sup>; absolute values of factor loadings were used to compute  $\omega_S$ <sup>1</sup>.

## Results

### Gender and Age Effects

#### General Factor (GF)

This factor showed significant main effects of age ( $F(4, 2277)=6.07, p<.001, \eta^2=.010$ , adolescents > adults, the mean difference for age groups 16-19 and 22-24 = .23,  $p<.001$ ) and gender ( $F(1, 2277)=7.70, p<.006, \eta^2=.003$ , boys > girls, the mean difference .11,  $p<.006$ ). There was an interaction between age and gender ( $F(4, 2277)=3.92, p<.003, \eta^2=.006$ ) indicating faster decrease in GF in older age groups in girls compared to boys (see Supplementary Figure 2).

#### Specific factor 1 (SF1)

There were main effects of gender ( $F(1, 2277)= 262.27, p<.001, \eta^2=.10$ , girls > boys, mean difference = .58,  $p<.001$ , see Supplementary Figure 2) and of age ( $F(4, 2277)= 6.46, p<.001, \eta^2=.011$ ; adults > adolescents, mean difference between 14-15 and 22-24 =.24,  $p<.001$ ), the correlation (Spearman's rho) between age and this factor was however negligible (.09,  $p<.001$ ).

#### Specific factor 2 (SF2)

There was a main effect of gender ( $F(1, 2277) = 159.23, p<.001, \eta^2 = .06$ ; males > females, mean difference .45,  $p<.001$ ). No significant main effect of age, or gender x age interaction was found (see Supplementary Figure 2).

### *Specific factor 3 (SF3)*

There was a main effect of age ( $F(4, 2277) = 8.18, p < .001, \eta^2 = .014$ , older > younger, mean difference between 14-15 and 22-24 years old, 0.20,  $p < .005$ ). The main effect of gender was marginal ( $\eta^2 = .003$ ; girls > boys .09,  $p = .014$ ). There was no age x gender interaction (see Supplementary Figure 2).

### *Specific factor 4 (SF4)*

There was a significant main effect of age ( $F(4, 2277) = 4.38, p = .002, \eta^2 = .009$ ); 18-19 > 14-15 (mean difference .18,  $p = .023$ ) and 18-19 > 22-24 (mean difference .18,  $p = .012$ ) and significant main effect of gender ( $F(4, 2277) = 12.73, p < .001, \eta^2 = .006$ ); boys > girls .13,  $p < .001$ . There was an age x gender interaction ( $F(4, 2277) = 3.36, p = .009, \eta^2 = .006$ ); overall females had lower scores than males in all age groups (in particular 22-

24), except for the group 14-15, where this trend was reversed for the genders (see Supplementary Figure 2).

### **References (Supplement):**

1. Gignac, G.E. On the inappropriateness of using items to calculate total scale score reliability via coefficient Alpha for multidimensional scales. *Eur J Psychol Assess.* **30**, 130-139 (2014).
2. Reise, S. P. The rediscovery of bifactor measurement models. *Multivariate Behav Res.* **47**, 667-696 (2012).

**Figure 1. Network plot of correlations between 116 items used in this study (represented as circles)**

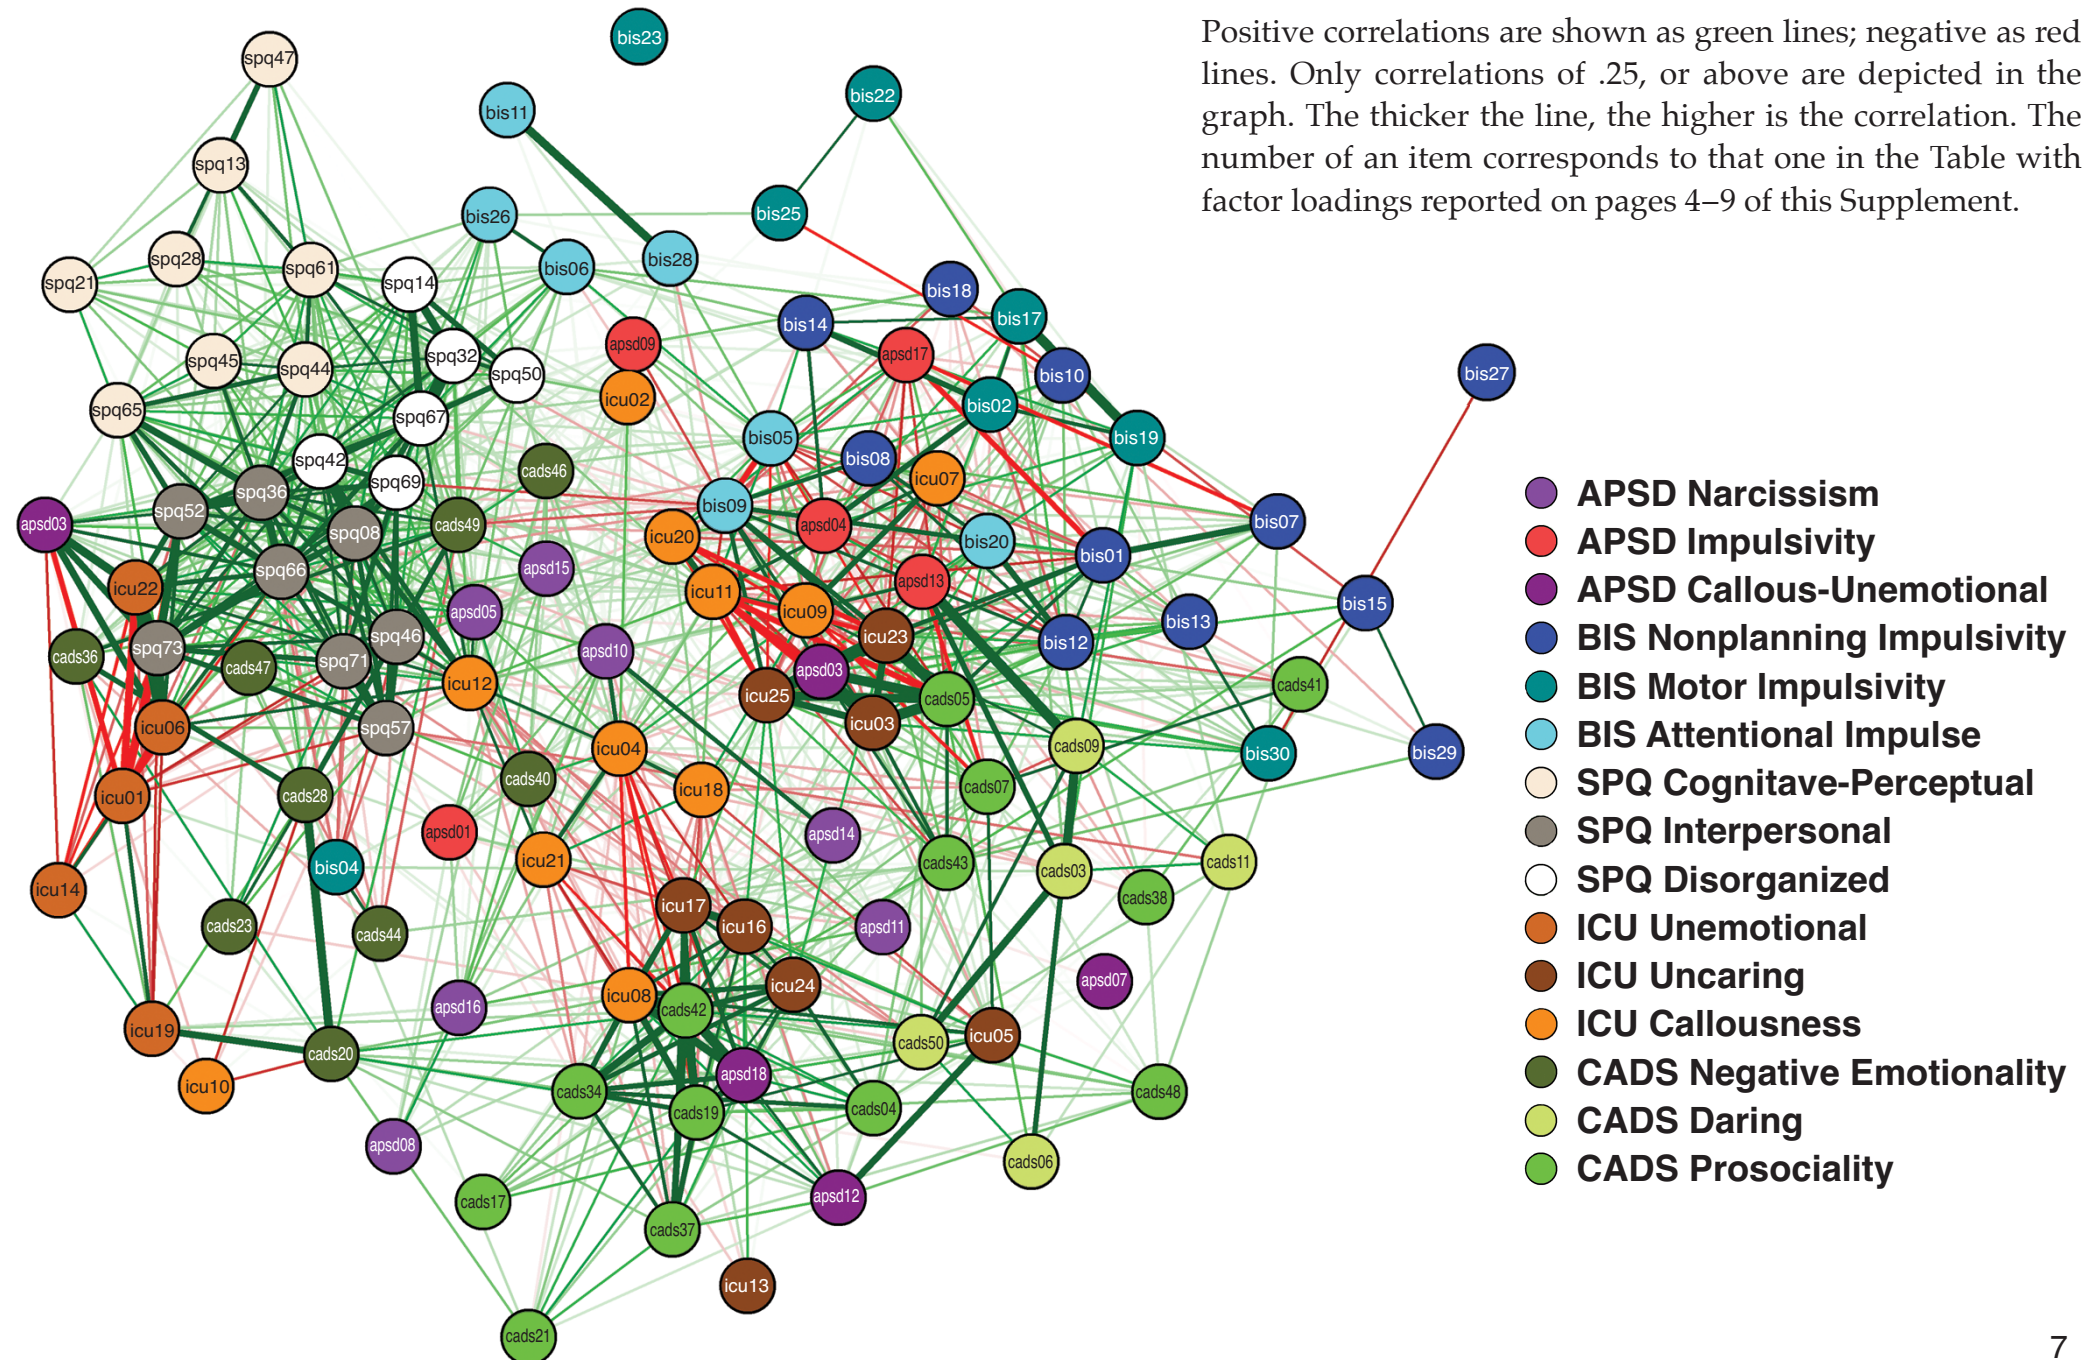

Figure 2. Age and Gender Effects on Levels of the General Factor and Specific Factors (with confidence intervals)

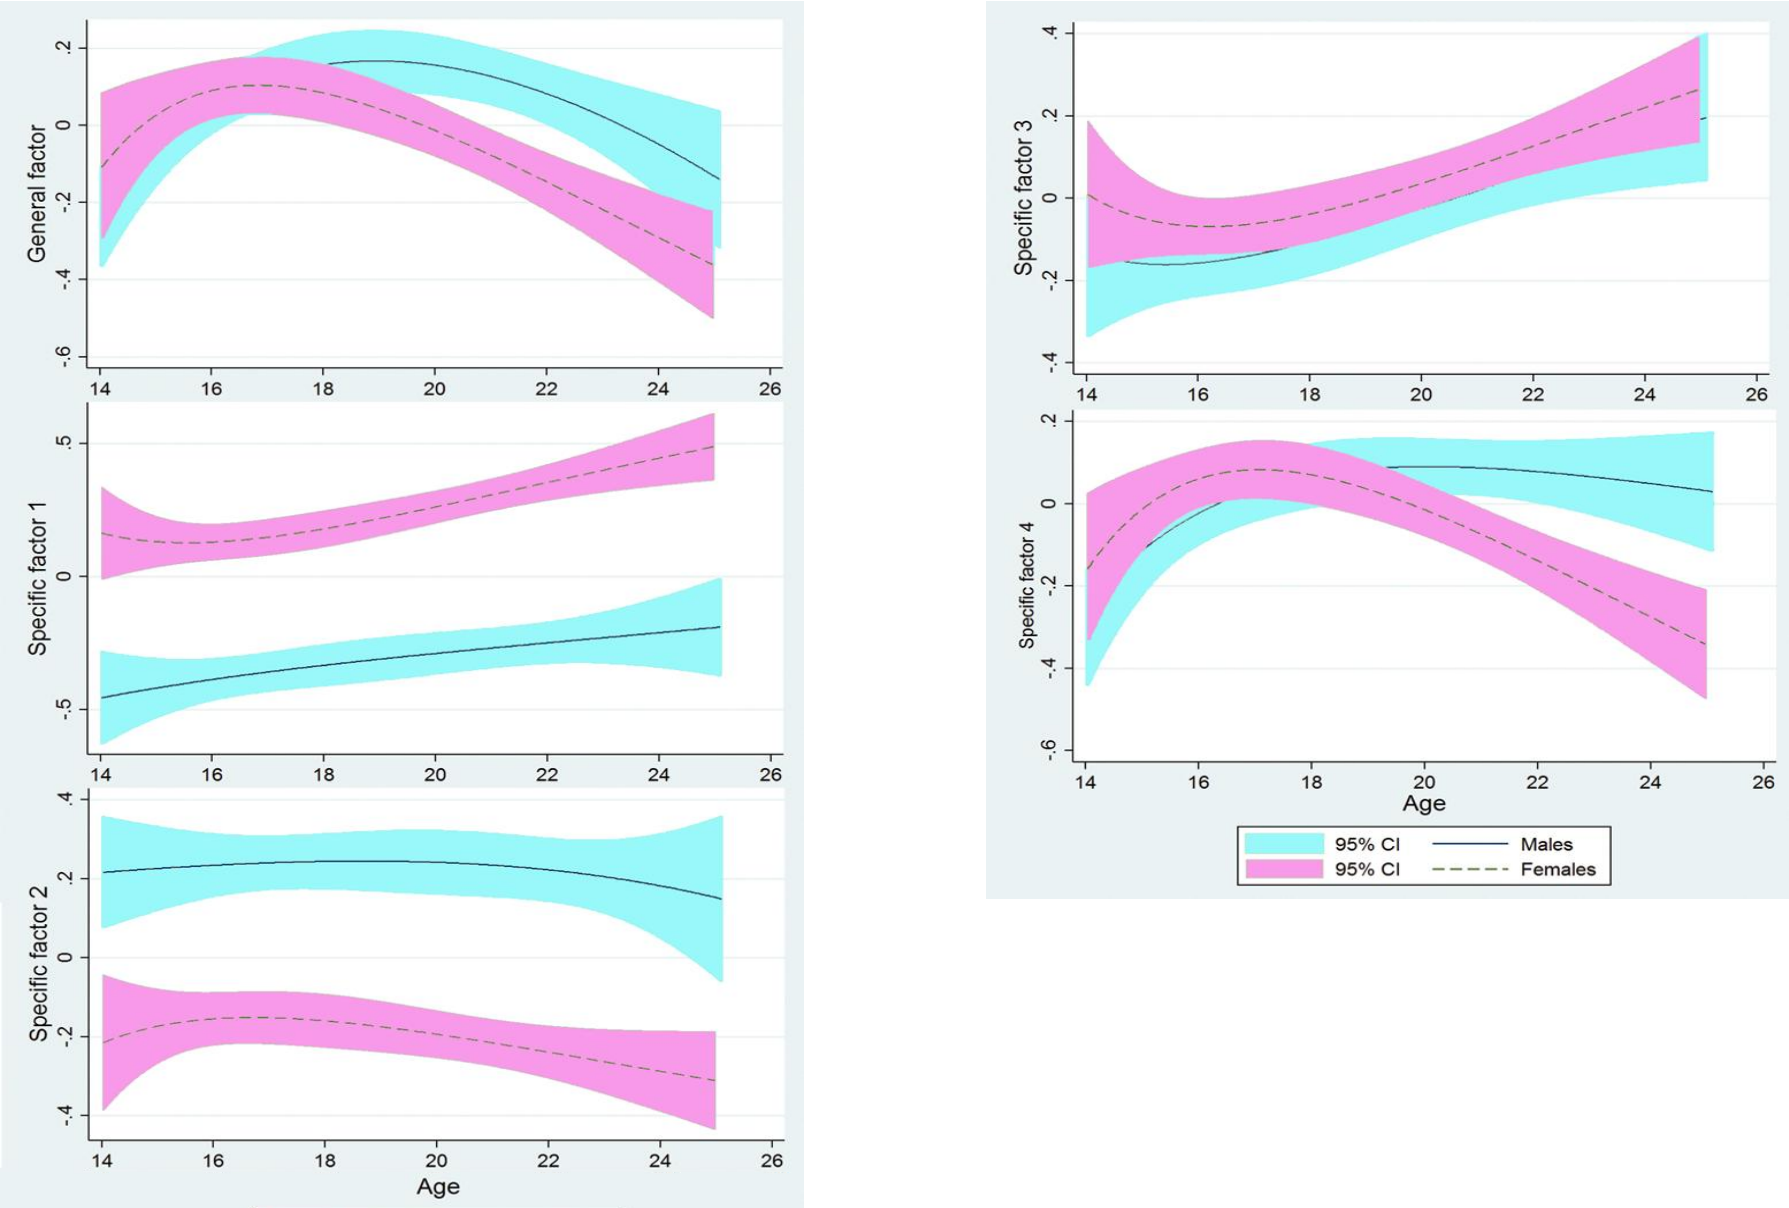

**Table 1. Factor Loadings in bifactor EFA and CFA**

| ITEM NR | SCALE                       | ITEM                                                                         | EFA-<br>GF | EFA-<br>SF1 | EFA-<br>SF2 | EFA-<br>SF3 | EFA-<br>SF4 | CFA-<br>GF | CFA-<br>SF1 | CFA-<br>SF2 | CFA-<br>SF3 | CFA-<br>SF4 |
|---------|-----------------------------|------------------------------------------------------------------------------|------------|-------------|-------------|-------------|-------------|------------|-------------|-------------|-------------|-------------|
| APSD01  | Impulsivity                 | <i>You blame others for your mistakes.</i>                                   | .42*       | -.13*       | -.00        | .07*        | -.20*       | .40        |             |             |             |             |
| APSD03  | Callous-<br>Unemotional     | <i>You care about how well you do at school/work.</i>                        | -.39*      | .14*        | -.03        | .67*        | -.13*       | -.44       |             |             | .68         |             |
| APSD04  | Impulsivity                 | <i>You act without thinking of the consequences.</i>                         | .50*       | -.08*       | .28*        | -.22*       | -.11*       | .58        |             |             |             |             |
| APSD05  | Narcissism                  | <i>Your emotions are shallow and fake.</i>                                   | .52*       | -.12*       | .04         | .03         | .19*        | .55        |             |             |             |             |
| APSD07  | Callous-<br>Unemotional     | <i>You are good at keeping promises.</i>                                     | -.26*      | .20*        | .14*        | .13*        | .15*        | -.30       |             |             |             |             |
| APSD08  | Narcissism                  | <i>You brag a lot about your abilities, accomplishments, or possessions.</i> | .22*       | -.18*       | .18*        | .24*        | -.24*       | .17        |             |             |             |             |
| APSD09  | Impulsivity                 | <i>You get bored easily.</i>                                                 | .48*       | .04         | .06*        | -.09*       | .01         | .49        |             |             |             |             |
| APSD10  | Narcissism                  | <i>You use or con other people to get what you want.</i>                     | .54*       | -.17*       | .22*        | .16*        | -.12*       | .51        |             |             |             |             |
| APSD11  | Narcissism                  | <i>You tease or make fun of other people.</i>                                | .31*       | -.22*       | .14*        | .14*        | -.17*       | .30        |             |             |             |             |
| APSD12  | Callous-<br>Unemotional     | <i>You feel bad or guilty when you do something wrong.</i>                   | -.01       | .57*        | -.08*       | .18*        | .00         | -.08       | .59         |             |             |             |
| APSD13  | Impulsivity                 | <i>You do risky or dangerous things.</i>                                     | .39*       | -.05*       | .66*        | -.05*       | .06*        | .43        |             | .65         |             |             |
| APSD14  | Narcissism                  | <i>You act charming and nice to get things you want.</i>                     | .28*       | -.03        | .27*        | .18*        | -.21*       | .23        |             |             |             |             |
| APSD15  | Narcissism                  | <i>You get angry when corrected or punished.</i>                             | .53*       | .04         | -.03        | .06*        | -.22*       | .48        |             |             |             |             |
| APSD16  | Narcissism                  | <i>You think you are better or more important than other people.</i>         | .31*       | -.22*       | .11*        | .35*        | -.22*       | .30        |             |             | .26         |             |
| APSD17  | Impulsivity                 | <i>You do not plan ahead or you leave things until the last minute.</i>      | .36*       | .03         | .19*        | -.40*       | .03         | .38        |             |             | -.40        |             |
| APSD18  | Callous-<br>Unemotional     | <i>You are concerned about the feelings of others.</i>                       | -.26*      | .71*        | .06*        | .03         | .01         | -.27       | .71         |             |             |             |
| APSD19  | Callous-<br>Unemotional     | <i>You hide your feelings or emotions from others.</i>                       | .40*       | .12*        | .00         | .00         | .57*        | .36        |             |             |             | .63         |
| BIS01   | Nonplanning-<br>Impulsivity | <i>I plan tasks carefully.</i>                                               | -.30*      | .10*        | -.13*       | .57*        | .02         | -.33       |             |             | .57         |             |
| BIS02   | Motor-<br>Impulsivity       | <i>I do things without thinking.</i>                                         | .43*       | .02         | .35*        | -.25*       | -.17*       | .49        |             | .34         |             |             |

Significance levels (2-tailed): \* $P < 0.01$ . Magnitude of Loadings: Negligible (below .10)  , Low (.1 to .3)  , Moderate (above .3 to .5)  , High (above .5)  .

| ITEM NR | SCALE                   | ITEM                                                     | EFA-<br>GF | EFA-<br>SF1 | EFA-<br>SF2 | EFA-<br>SF3 | EFA-<br>SF4 | CFA-<br>GF | CFA-<br>SF1 | CFA-<br>SF2 | CFA-<br>SF3 | CFA-<br>SF4 |
|---------|-------------------------|----------------------------------------------------------|------------|-------------|-------------|-------------|-------------|------------|-------------|-------------|-------------|-------------|
| BIS04   | Motor-Impulsivity       | <i>I am happy-go-lucky.</i>                              | -.28*      | .05*        | .46*        | -.02        | -.16*       | -.29       |             | .45         |             |             |
| BIS05   | Attentional-Impulsivity | <i>I don't pay attention.</i>                            | .52*       | -.02        | .13*        | -.35*       | -.04        | .54        |             |             | -.30        |             |
| BIS06   | Attentional-Impulsivity | <i>I have racing thoughts.</i>                           | .53*       | .17*        | .17*        | .04         | .01         | .50        |             |             |             |             |
| BIS07   | Nonplanning-Impulsivity | <i>I plan trips well ahead of time.</i>                  | -.18*      | .10*        | -.16*       | .49*        | -.02        | -.21       |             |             | .50         |             |
| BIS08   | Nonplanning-Impulsivity | <i>I am self-controlled.</i>                             | -.39*      | -.01        | .08*        | .40*        | .14*        | -.38       |             |             | .39         |             |
| BIS09   | Attentional-Impulsivity | <i>I concentrate easily.</i>                             | -.54*      | -.05*       | .06*        | .48*        | .00         | -.54       |             |             | .45         |             |
| BIS10   | Nonplanning-Impulsivity | <i>I save regularly.</i>                                 | -.34*      | -.02        | -.05*       | .36*        | .09*        | -.34       |             |             | .34         |             |
| BIS11   | Attentional-Impulsivity | <i>I squirm at plays and lectures.</i>                   | .37*       | .04         | .03         | -.03        | .04         | .38        |             |             |             |             |
| BIS12   | Nonplanning-Impulsivity | <i>I am a careful thinker.</i>                           | -.34*      | .12*        | -.03        | .54*        | .13*        | -.36       |             |             | .52         |             |
| BIS13   | Nonplanning-Impulsivity | <i>I plan for job security.</i>                          | -.22*      | .09*        | -.01        | .47*        | -.02        | -.25       |             |             | .47         |             |
| BIS14   | Nonplanning-Impulsivity | <i>I say things without thinking.</i>                    | .47*       | .03         | .24*        | -.11*       | -.20*       | .49        |             |             |             |             |
| BIS15   | Nonplanning-Impulsivity | <i>I like to think about complex problems.</i>           | .01        | .06*        | .25*        | .47*        | .08*        | .00        |             |             | .45         |             |
| BIS17   | Motor-Impulsivity       | <i>I act on impulse.</i>                                 | .38*       | .10*        | .53*        | -.09*       | -.19*       | .39        |             | .55         |             |             |
| BIS18   | Nonplanning-Impulsivity | <i>I get easily bored when solving thought problems.</i> | .33*       | -.00        | -.03        | -.29*       | -.09*       | .40        |             |             |             |             |
| BIS19   | Motor-Impulsivity       | <i>I act on the spur of the moment.</i>                  | .31*       | .10*        | .59*        | -.14*       | -.19*       | .33        |             | .62         |             |             |
| BIS20   | Attentional-Impulsivity | <i>I am a steady thinker.</i>                            | -.37*      | -.01        | .07*        | .50*        | .11*        | -.37       |             |             | .49         |             |
| BIS22   | Motor-Impulsivity       | <i>I buy things on impulse.</i>                          | .27*       | .18*        | .15*        | -.06*       | -.19*       | .25        |             |             |             |             |

Significance levels (2-tailed): \* $P < 0.01$ . Magnitude of Loadings: Negligible (below .10) □, Low (.1 to .3) ■, Moderate (above .3 to .5) ■, High (above .5) ■.

| ITEM NR | SCALE                   | ITEM                                                                       | EFA-GF | EFA-SF1 | EFA-SF2 | EFA-SF3 | EFA-SF4 | CFA-GF | CFA-SF1 | CFA-SF2 | CFA-SF3 | CFA-SF4 |
|---------|-------------------------|----------------------------------------------------------------------------|--------|---------|---------|---------|---------|--------|---------|---------|---------|---------|
| BIS23   | Motor-Impulsivity       | <i>I can only think about one thing at a time.</i>                         | .23*   | .01     | -.08*   | -.08*   | .03     | .25    |         |         |         |         |
| BIS25   | Motor-Impulsivity       | <i>I spend or charge more than I earn.</i>                                 | .40*   | .09*    | .11*    | -.13*   | -.14*   | .40    |         |         |         |         |
| BIS26   | Attentional-Impulsivity | <i>I often have extraneous thoughts when thinking.</i>                     | .47*   | .16*    | .12*    | .10*    | .06     | .43    |         |         |         |         |
| BIS27   | Nonplanning-Impulsivity | <i>I am more interested in the present than the future.</i>                | .07*   | -.02    | .21*    | -.23*   | .00     | .15    |         |         |         |         |
| BIS28   | Attentional-Impulsivity | <i>I am restless at the theatre or lecture.</i>                            | .45*   | .02     | .07*    | -.10*   | .03     | .48    |         |         |         |         |
| BIS29   | Nonplanning-Impulsivity | <i>I like puzzles.</i>                                                     | -.13*  | .06*    | .12*    | .34*    | .11*    | -.13   |         |         | .34     |         |
| BIS30   | Motor-Impulsivity       | <i>I am future orientated.</i>                                             | -.11*  | .11*    | .02     | .54*    | -.08*   | -.16   |         |         | .51     |         |
| CADS03  | Daring                  | <i>Are you daring and adventurous?</i>                                     | .07*   | .03     | .77*    | .08*    | -.02    | .06    |         | .78     |         |         |
| CADS04  | Prosociality            | <i>Do you do things to help other people your age without being asked?</i> | -.19*  | .47*    | .32*    | .19*    | .04*    | -.24   | .45     |         |         |         |
| CADS05  | Prosociality            | <i>Do you try to do excellent work in school or at work?</i>               | -.36*  | .21*    | -.02    | .70*    | -.07*   | -.41   |         |         | .71     |         |
| CADS06  | Daring                  | <i>Do you like rough games and sports?</i>                                 | .00    | -.19*   | .52*    | .12*    | .07*    | .01    |         | .53     |         |         |
| CADS07  | Prosociality            | <i>Would you feel guilty if you did something that broke the law?</i>      | -.32*  | .31*    | -.33*   | .21*    | .04*    | -.44   |         | -.33    |         |         |
| CADS09  | Daring                  | <i>Do you enjoy doing things that are risky or dangerous?</i>              | .25*   | -.10*   | .77*    | .00     | .06*    | .28    |         | .78     |         |         |
| CADS11  | Daring                  | <i>Do you like things that are exciting and loud?</i>                      | .04    | .07*    | .49*    | -.06*   | -.17*   | .04    |         | .51     |         |         |
| CADS17  | Prosociality            | <i>Do you share your things with other people without being asked?</i>     | -.18*  | .38*    | .23*    | .05*    | -.11*   | -.20   | .37     |         |         |         |
| CADS19  | Prosociality            | <i>Do you feel bad for other people when they get hurt?</i>                | -.21*  | .72*    | -.06*   | .05*    | -.02    | -.25   | .73     |         |         |         |
| CADS20  | Negative Emotionality   | <i>Are you emotional?</i>                                                  | .16*   | .61*    | -.26*   | .00     | -.39*   | .11    | .63     |         |         |         |
| CADS21  | Prosociality            | <i>Would you get upset if you saw an animal being hurt?</i>                | -.03   | .46*    | -.12*   | -.01    | -.09*   | -.04   | .48     |         |         |         |

Significance levels (2-tailed): \* $P < 0.01$ . Magnitude of Loadings: Negligible (below .10) □, Low (.1 to .3) □, Moderate (above .3 to .5) □, High (above .5) ■.

| ITEM NR | SCALE                 | ITEM                                                                              | EFA-GF | EFA-SF1 | EFA-SF2 | EFA-SF3 | EFA-SF4 | CFA-GF | CFA-SF1 | CFA-SF2 | CFA-SF3 | CFA-SF4 |
|---------|-----------------------|-----------------------------------------------------------------------------------|--------|---------|---------|---------|---------|--------|---------|---------|---------|---------|
| CADS23  | Negative Emotionality | <i>Are you easily embarrassed?</i>                                                | .25*   | .29*    | -.39*   | .03     | .07     | .20    |         | -.40    |         |         |
| CADS28  | Negative Emotionality | <i>Do you get upset easily?</i>                                                   | .43*   | .51*    | -.39*   | .01     | -.21*   | .41    | .58     |         |         |         |
| CADS34  | Prosociality          | <i>Do you try to cheer up other people your age who are sad or upset?</i>         | -.22*  | .66*    | .21*    | .07*    | -.09*   | -.25   | .64     |         |         |         |
| CADS36  | Negative Emotionality | <i>Do you react intensely when you get upset?</i>                                 | .46*   | .29*    | -.15*   | .10*    | -.26*   | .37    |         |         |         |         |
| CADS37  | Prosociality          | <i>Do you feel sorry for kids who get picked on?</i>                              | -.09*  | .63*    | -.04*   | .05*    | -.01    | -.11   | .64     |         |         |         |
| CADS38  | Prosociality          | <i>Are you cautious?</i>                                                          | -.03   | .26*    | -.37*   | .30*    | .09*    | -.15   |         | -.39    |         |         |
| CADS40  | Negative Emotionality | <i>Are you selfish?</i>                                                           | .47*   | -.19*   | -.08*   | .09*    | -.18*   | .45    |         |         |         |         |
| CADS41  | Prosociality          | <i>Do you want everyone to follow the rules, including yourself?</i>              | -.18*  | .14*    | -.28*   | .34*    | .08*    | -.24   |         |         | .29     |         |
| CADS42  | Prosociality          | <i>Do you care about other people's feelings?</i>                                 | -.31*  | .81*    | -.00    | .01     | -.02    | -.34   | .81     |         |         |         |
| CADS43  | Prosociality          | <i>Do you enjoy learning about new and interesting things?</i>                    | -.24*  | .29*    | .22*    | .44*    | -.02    | -.29   |         |         | .45     |         |
| CADS44  | Negative Emotionality | <i>Are you calm and easy-going?</i>                                               | -.35*  | .06*    | .42*    | .01     | .11*    | -.34   |         | .35     |         |         |
| CADS46  | Negative Emotionality | <i>Do you exaggerate things and blow them out of proportion?</i>                  | .44*   | .03     | .01     | .10*    | -.30*   | .40    |         |         |         | -.19    |
| CADS47  | Negative Emotionality | <i>Are you jealous of what other people have?</i>                                 | .46*   | .11*    | -.17*   | .04     | -.14*   | .40    |         |         |         |         |
| CADS48  | Prosociality          | <i>Are you concerned about what is right and wrong?</i>                           | -.06*  | .37*    | -.11*   | .27*    | .00     | -.16   | .39     |         |         |         |
| CADS49  | Negative Emotionality | <i>Do your moods change unpredictably?</i>                                        | .61*   | .28*    | -.15*   | -.05*   | -.09    | .57    |         |         |         |         |
| CADS50  | Daring                | <i>Are you brave?</i>                                                             | -.05   | -.01    | .62*    | .17*    | -.02    | -.10   |         | .63     |         |         |
| ICU01   | Unemotional           | <i>I express my feelings openly.</i>                                              | -.31*  | .13*    | .17*    | .06*    | -.67*   | -.30   |         |         |         | -.73    |
| ICU02   | Callousness           | <i>What I think is right and wrong is different from what other people think.</i> | .40*   | -.06*   | .18*    | .13*    | -.02    | .38    |         |         |         |         |
| ICU03   | Uncaring              | <i>I care about how well I do at school or work.</i>                              | -.37*  | .18*    | .00     | .68*    | -.10*   | -.41   |         |         | .70     |         |

Significance levels (2-tailed): \* $P < 0.01$ . Magnitude of Loadings: Negligible (below .10) □, Low (.1 to .3) □, Moderate (above .3 to .5) □, High (above .5) ■.

| ITEM NR | SCALE                | ITEM                                                                                                           | EFA-GF | EFA-SF1 | EFA-SF2 | EFA-SF3 | EFA-SF4 | CFA-GF | CFA-SF1 | CFA-SF2 | CFA-SF3 | CFA-SF4 |
|---------|----------------------|----------------------------------------------------------------------------------------------------------------|--------|---------|---------|---------|---------|--------|---------|---------|---------|---------|
| ICU04   | Callousness          | <i>I do not care who I hurt to get what I want.</i>                                                            | .55*   | -.41*   | .21*    | .20*    | -.09*   | .52    | -.38    |         |         |         |
| ICU05   | Uncaring             | <i>I feel bad or guilty when I do something wrong.</i>                                                         | -.17*  | .54*    | -.18*   | .20*    | .04     | -.25   | .53     |         |         |         |
| ICU06   | Unemotional          | <i>I do not show my emotions to others.</i>                                                                    | .39*   | -.11*   | -.00    | .02     | .70*    | .37    |         |         |         | .74     |
| ICU07   | Callousness          | <i>I do not care about being on time.</i>                                                                      | .40*   | -.08*   | .24*    | -.30*   | .00     | .44    |         |         | -.27    |         |
| ICU08   | Callousness          | <i>I am concerned about the feelings of others.</i>                                                            | -.31*  | .75*    | -.01    | .04     | .00     | -.33   | .74     |         |         |         |
| ICU09   | Callousness          | <i>I do not care if I get into trouble.</i>                                                                    | .42*   | -.16*   | .43*    | -.24*   | .08*    | .54    |         | .38     |         |         |
| ICU10   | Callousness          | <i>I do not let my feelings control me.</i>                                                                    | -.19*  | -.25*   | .26*    | .13*    | .27*    | -.15   |         |         |         |         |
| ICU11   | Callousness          | <i>I do not care about doing things well.</i>                                                                  | .50*   | -.10*   | .08*    | -.42*   | .11*    | .54    |         |         | -.41    |         |
| ICU12   | Callousness          | <i>I seem very cold and uncaring to others.</i>                                                                | .58*   | -.24*   | .00     | .14*    | .27*    | .61    |         |         |         |         |
| ICU13   | Uncaring             | <i>I easily admit to being wrong.</i>                                                                          | -.24*  | .27*    | .10*    | .01     | .15*    | -.26   |         |         |         |         |
| ICU14   | Unemotional          | <i>It is easy for others to tell how I am feeling.</i>                                                         | -.23*  | .21*    | .05*    | .02     | -.47*   | -.24   |         |         |         | -.53    |
| ICU15   | Uncaring             | <i>I always try my best.</i>                                                                                   | -.48*  | .20*    | .06*    | .62*    | .03     | -.50   |         |         | .64     |         |
| ICU16   | Uncaring             | <i>I apologise (say I am sorry) to persons I hurt.</i>                                                         | -.38*  | .55*    | .05*    | .05*    | .10*    | -.40   | .52     |         |         |         |
| ICU17   | Uncaring             | <i>I try not to hurt others feelings.</i>                                                                      | -.41*  | .62*    | .01     | .02     | .16*    | -.42   | .60     |         |         |         |
| ICU18   | Callousness          | <i>I do not feel remorseful when I do something wrong.</i>                                                     | .39*   | -.32*   | .19*    | -.04    | .05     | .43    | -.32    |         |         |         |
| ICU19   | Unemotional          | <i>I am very expressive and emotional.</i>                                                                     | -.01   | .43*    | -.03    | .06*    | -.56*   | -.08   |         |         |         | -.54    |
| ICU20   | Callousness          | <i>I do not like to put the time into doing things well.</i>                                                   | .47*   | -.08*   | .04     | -.32*   | .03     | .48    |         |         | -.33    |         |
| ICU21   | Callousness          | <i>The feelings of others are unimportant to me.</i>                                                           | .40*   | -.40*   | .09*    | .07*    | .11*    | .41    | -.38    |         |         |         |
| ICU22   | Unemotional          | <i>I hide my feelings from others.</i>                                                                         | .46*   | .01     | -.02    | .04     | .70*    | .42    |         |         |         | .74     |
| ICU23   | Uncaring             | <i>I work hard on everything I do.</i>                                                                         | -.46*  | .16*    | .03     | .67*    | .03*    | -.47   |         |         | .69     |         |
| ICU24   | Uncaring             | <i>I do things to make others feel good.</i>                                                                   | -.30*  | .56*    | .17*    | .18*    | .01     | -.36   | .54     |         |         |         |
| SPQ08   | Interpersonal        | <i>People sometimes find me aloof and distant.</i>                                                             | .61*   | .08*    | -.14*   | .04     | .31*    | .59    |         |         |         | .27     |
| SPQ13   | Cognitive-Perceptual | <i>Have you ever had the sense that some person or force is around you, even though you cannot see anyone?</i> | .37*   | .22*    | .06*    | .03     | .10*    | .34    |         |         |         |         |
| SPQ14   | Disorganized         | <i>People sometimes comment on my unusual mannerisms and habits.</i>                                           | .55*   | .13*    | .10*    | .11*    | .11*    | .52    |         |         |         |         |
| SPQ21   | Cognitive-Perceptual | <i>Are you sometimes sure that other people can tell what you are thinking?</i>                                | .38*   | .20*    | .00     | .08*    | .00     | .34    |         |         |         |         |

Significance levels (2-tailed): \* $P < 0.01$ . Magnitude of Loadings: Negligible (below .10) □, Low (.1 to .3) □, Moderate (above .3 to .5) □, High (above .5) ■.

| ITEM NR | SCALE                | ITEM                                                                                              | EFA-GF | EFA-SF1 | EFA-SF2 | EFA-SF3 | EFA-SF4 | CFA-GF | CFA-SF1 | CFA-SF2 | CFA-SF3 | CFA-SF4 |
|---------|----------------------|---------------------------------------------------------------------------------------------------|--------|---------|---------|---------|---------|--------|---------|---------|---------|---------|
| SPQ28   | Cognitive-Perceptual | <i>Have you ever noticed a common event or object that seemed to be a special sign for you?</i>   | .41*   | .18*    | .08*    | .15*    | .00     | .35    |         |         |         |         |
| SPQ32   | Disorganized         | <i>Some people think that I am a very bizarre person.</i>                                         | .66*   | .15*    | .06*    | .09*    | .12     | .64    |         |         |         |         |
| SPQ36   | Interpersonal        | <i>I feel I have to be on my guard even with friends.</i>                                         | .66*   | .14*    | -.17*   | .12*    | .28*    | .65    |         |         |         |         |
| SPQ42   | Disorganized         | <i>Some people find me a bit vague and elusive during a conversation.</i>                         | .58*   | .05     | -.11*   | .05     | .31*    | .56    |         |         |         | .27     |
| SPQ44   | Cognitive-Perceptual | <i>Do you often pick up hidden threats or put-downs from what people say?</i>                     | .58*   | .17*    | .00     | .11*    | .10     | .54    |         |         |         |         |
| SPQ45   | Cognitive-Perceptual | <i>When shopping, do you get the feeling that other people are taking notice of you?</i>          | .50*   | .20*    | -.06*   | .03     | .07     | .47    |         |         |         |         |
| SPQ46   | Interpersonal        | <i>I feel very uncomfortable in social situations involving unfamiliar people.</i>                | .52*   | .11*    | -.54*   | -.01    | .32*    | .55    |         | -.64    |         |         |
| SPQ47   | Cognitive-Perceptual | <i>Have you had experiences with astrology, seeing the future, UFOs, ESP, or a sixth sense?</i>   | .31*   | .13*    | .09*    | .08*    | .08     | .28    |         |         |         |         |
| SPQ50   | Disorganized         | <i>I sometimes use words in unusual ways.</i>                                                     | .54*   | .02     | .18*    | .17*    | .07     | .50    |         |         |         |         |
| SPQ52   | Interpersonal        | <i>Have you found that it is best not to let other people know too much about you?</i>            | .56*   | .05*    | -.09*   | .09*    | .43*    | .52    |         |         |         | .46     |
| SPQ57   | Interpersonal        | <i>I tend to keep in the background on social occasions.</i>                                      | .42*   | .04     | -.45*   | -.03    | .40*    | .48    |         | -.53    |         |         |
| SPQ61   | Cognitive-Perceptual | <i>Do you ever suddenly feel distracted by distant sounds that you are not normally aware of?</i> | .50*   | .13*    | .04     | .07*    | .17*    | .49    |         |         |         |         |
| SPQ65   | Cognitive-Perceptual | <i>Do you often have to keep an eye out to stop people from taking advantage of you?</i>          | .51*   | .24*    | -.05    | .14*    | .18*    | .47    |         |         |         |         |
| SPQ66   | Interpersonal        | <i>Do you feel that you cannot get close to people?</i>                                           | .60*   | .06*    | -.20*   | .06*    | .39*    | .57    |         |         |         | .41     |
| SPQ67   | Disorganized         | <i>I am an odd, unusual person.</i>                                                               | .70*   | .13*    | .03     | .12*    | .21*    | .68    |         |         |         |         |
| SPQ69   | Disorganized         | <i>I find it hard to communicate clearly what I want to say to people.</i>                        | .56*   | .09*    | -.20*   | -.04    | .26*    | .59    |         |         |         |         |
| SPQ71   | Interpersonal        | <i>I feel very uneasy talking to people I do not know well.</i>                                   | .51*   | .08*    | -.51*   | -.05*   | .36*    | .56    |         | -.60    |         |         |
| SPQ73   | Interpersonal        | <i>I tend to keep my feelings to myself.</i>                                                      | .45*   | -.04    | -.15*   | .06*    | .72*    | .43    |         |         |         | .75     |

Significance levels (2-tailed): \* $P < 0.01$ . Magnitude of Loadings: Negligible (below .10) □, Low (.1 to .3) □, Moderate (above .3 to .5) □, High (above .5) ■.
